# Supplementary material for: Haustorium initiation in the obligate parasitic plant Phelipanche ramosa involves a host-exudated cytokinin signal
Source: PubMed Central journal article supplement (PMC5853424; doi:10.1093/jxb/erx359), 2017-10-21
Supplement: erx359_suppl_supplementary_tables_and_figures.pdf [file erx359_suppl_supplementary_tables_and_figures.pdf]

## Supplementary data

**Table S1:** Stock solutions used

Each compound was prepared as stock solution in the corresponding solvent and stored at -20°C. *c/tZ*, *tZ*, *tZR*, *tZOG*, *tZROG*, DHZ, DHZR, DHZOG, DHZROG, IPR and *mT* were purchased from OIChemIm (Czech Republic). IP, K, BAP, TDZ, GA3, ABA, NAA, ACC, JA, syringic acid, vanilic acid, DMBQ, coniferyl alcohol, p-coumaric acid, vanillin, and quercetin were purchased from Sigma Aldrich. Isorhamnetine and kaempferole were purchased from Extrasynthèse (France). *rac*-GR24 was provided by Dr. Binne Zwanenburg. PI-55 was provided by Dr. Lukáš Spíchal.

| compound                                 |                  | stock concentration | solvent solubilisation |
|------------------------------------------|------------------|---------------------|------------------------|
| name                                     | abbreviation     |                     |                        |
| <i>cis/trans</i> zeatin                  | <i>c/tZ</i>      | 10 µM               | ACN 50%                |
| <i>trans</i> zeatin                      | <i>tZ</i>        | 10 µM               | ACN 50%                |
| <i>trans</i> zeatin riboside             | <i>tZR</i>       | 10 µM               | ACN 50%                |
| <i>trans</i> zeatin O-glucoside          | <i>tZOG</i>      | 10 µM               | ACN 50%                |
| <i>trans</i> zeatin riboside O-glucoside | <i>tZROG</i>     | 10 µM               | ACN 50%                |
| dihydrozeatin                            | DHZ              | 10 µM               | ACN 50%                |
| dihydrozeatin riboside                   | DHZR             | 10 µM               | ACN 50%                |
| dihydrozeatin O-glucoside                | DHZOG            | 10 µM               | ACN 50%                |
| dihydrozeatin riboside O-glucoside       | DHZROG           | 10 µM               | ACN 50%                |
| isopentenyl adenine                      | IP               | 10 µM               | ACN 50%                |
| isopentenyl adenosine                    | IPR              | 10 µM               | ACN 50%                |
| <i>meta</i> -topolin                     | <i>mT</i>        | 10 µM               | ACN 50%                |
| kinetin                                  | K                | 10 µM               | ACN 50%                |
| 6-benzylaminopurine                      | BAP              | 10 µM               | ACN 50%                |
| thidiazuron                              | TDZ              | 10 µM               | ACN 50%                |
| racemic GR24                             | <i>rac</i> -GR24 | 10 µM               | ACN 50%                |
| giberrelin 3                             | GA3              | 10 µM               | ACN 50%                |
| abscisic acid                            | ABA              | 10 µM               | ACN 50%                |
| 1-naphthaleneacetic acid                 | NAA              | 10 µM               | ACN 50%                |
| 1-aminocyclopropane-1-carboxylic acid    | ACC              | 10 µM               | ACN 50%                |
| castosterone                             | /                | 10 µM               | DMSO 100%              |
| jasmonic acid                            | JA               | 500 µM              | DMSO 100%              |
| 6-(2-hydroxy-3-methylbenzylamino)purine  | PI-55            | 50 µM               | DMSO 100%              |
| syringic acid                            | /                | 10 µM               | DMSO 100%              |
| vanilic acid                             | /                | 10 µM               | DMSO 100%              |
| 2,6-Dimethoxy-1,4-benzoquinone           | DMBQ             | 10 µM               | DMSO 100%              |
| coniferyl alcohol                        | /                | 10 µM               | DMSO 100%              |
| p-coumaric acid                          | /                | 10 µM               | DMSO 100%              |
| vanillin                                 | /                | 10 µM               | DMSO 100%              |
| quercetin                                | /                | 10 µM               | DMSO 100%              |
| isorhamnetin                             | /                | 10 µM               | DMSO 100%              |
| kaempferol                               | /                | 10 µM               | DMSO 100%              |

**Table S2:** List of primers used for RT-qPCR analysis

Primers were ordered as salt-free-purified from Eurofins Genomics Company (Ebersberg, Germany)

| seq_id                 | primer_id    | sequence                  |
|------------------------|--------------|---------------------------|
| Pram_21119             | Pram_21119-F | GCAGGAGGTTCCCTTGAA        |
|                        | Pram_21119-R | GGTTGCTCCCAGACTTGAG       |
| Pram_46434             | Pram_46434-F | AACGATGCAGCAGACATGGA      |
|                        | Pram_46434-R | GCAGGAATAGCAGAGTTGTGTTTG  |
| Pram_43760             | Pram_43760-F | ACGCACACAAGAAGGAGAGACA    |
|                        | Pram_43760-R | TTCGGCTAGCCTGAATTTGC      |
| Pram_35892             | Pram_35892-F | AGGGTCGGTTCGAGAAAAGC      |
|                        | Pram_35892-R | CCCCATTGCCACGTGAAG        |
| Pram_16837<br>(PrRR5)  | Pram_16837-F | TCCTTTATCGGTGTCGGTATCC    |
|                        | Pram_16837-R | GGCGGCAGCACCATAGG         |
| Pram_42581<br>(PrCKX4) | Pram_42581-F | AAATGCATGTCTGCGGACAA      |
|                        | Pram_42581-R | TTCTATAATGGCATTGGCATCGT   |
| Pram_42809<br>(PrCKX2) | Pram_42809-F | CGTGTGGCCAAAAGACTGACA     |
|                        | Pram_42809-R | TCTTTCGTGGTTTTCCAATTAGG   |
| Pram_08523             | Pram_08523-F | GGGCTGCTCAATACTTGACGA     |
|                        | Pram_08523-R | CTTCAAAGTCGGGTCGATCAA     |
| Pram_43858             | Pram_43858-F | ACGGCACTTTGCTGGTCAATA     |
|                        | Pram_43858-R | TGCCCGGGCCGTAATT          |
| Pram_15221             | Pram_15221-F | GGGTGGCATTAGGTTACCAT      |
|                        | Pram_15221-R | CCGACGTTGGTGACGAGTACTA    |
| Pram_11045             | Pram_11045-F | CCCTCCGGCGGGTAATT         |
|                        | Pram_11045-R | GGAAGCTCAATGTCCGTGAAA     |
| Pram_22883             | Pram_22883-F | GTCGTGCTCCTTGAACATCA      |
|                        | Pram_22883-R | CGCCTTACTAGCCGCTTGA       |
| Pram_45828             | Pram_45828-F | CGTGGGCAAGAGCAAACC        |
|                        | Pram_45828-R | CCAGCCGCAGTGGAATT         |
| Pram_40182             | Pram_40182-F | GAATGCAAGCTTCTCCGTAGTCT   |
|                        | Pram_40182-R | GTGGGCAAAGGGTTTTCGA       |
| Pram_41284             | Pram_41284-F | GCTATGAATGATAGTGCTGAGTTCA |
|                        | Pram_41284-R | TCAAGAAGCAGCTCCATCCAT     |
| Pram_46808             | Pram_46808-F | CCGAACGACGGACAATACGT      |
|                        | Pram_46808-R | TTCCCGGAGATAAAAAATTCGA    |
| Pram_05576             | Pram_05576-F | GGCAGCAGCAATTTTTGAGAAC    |
|                        | Pram_05576-R | CCGGGCAACCCCAATC          |
| Pram_10105             | Pram_10105-F | CCTGTGGAAGAGCAGACTGTT     |
|                        | Pram_10105-R | AATCCAGAACGCTCCATTCT      |
| Pram_00316             | Pram_00316-F | TGCCGAAATTCTCAAAGATCGT    |
|                        | Pram_00316-R | GCACTCGCTACATCATTGCAA     |
| Pram_08710             | Pram_08710-F | GGTCGACACGTCTCGTACGA      |
|                        | Pram_08710-R | GTCCGACGAAGCGAAAACCT      |
| Pram_00348             | Pram_00348-F | GCTGCCCGCTGTCAAGA         |
|                        | Pram_00348-R | GGCGAGTCACCAAGTTGAACA     |
| Pram_00012<br>(18s)    | Pram_00012-F | CCAACTGCGCGCTAACCTA       |
|                        | Pram_00012-R | CCGTCCTGCTGTCTTAATCGA     |

**Table S3:** Summary of the *de novo* assembly of the *P. ramosa* transcriptome. BlastX with threshold e-value less than  $10^{-10}$ .

|                                      | <b>values</b> |
|--------------------------------------|---------------|
| reads                                | 1,251,288     |
| number of bases                      | 50,967,042    |
| number of contigs                    | 53,511        |
| maximum length (bp)                  | 7,872         |
| minimum length (bp)                  | 100           |
| average length (bp)                  | 952           |
| N50 length (bp)                      | 1,071         |
| blast hits to <i>A. thaliana</i>     | 27,448 (51%)  |
| blast hits to <i>S. lycopersicum</i> | 29,380 (55%)  |
| UCO hits                             | 351 (98%)     |
| APVO hits                            | 797 (82%)     |

**Table S4:** Effect of treatments with known HIF and solvent effect on haustorium formation in *P. ramosa*. (A) *P. ramosa* germinated seeds were treated for 72h with HIF with concentration ranging from  $10^{-4}$  M to  $10^{-10}$  M. (B) *P. ramosa* germinated seeds were treated either with solvents (DMSO and ACN) in concentration ranging from 1% to 0.00001% or in co-treatment with half diluted *B. napus* root exudates. Exudates were half diluted in buffer solution (HEPES 0.5 mM, PPM 0.05 %). Means are values  $\pm$  SE (n = 6). NI (non induced).

| A | compound          | early haustoria induction (%) |             |             |             |             |             | /          |
|---|-------------------|-------------------------------|-------------|-------------|-------------|-------------|-------------|------------|
|   |                   | $10^{-4}$ M                   | $10^{-5}$ M | $10^{-6}$ M | $10^{-7}$ M | $10^{-8}$ M | $10^{-9}$ M |            |
|   | DMBQ              | NI                            | NI          | NI          | NI          | NI          | NI          |            |
|   | syringic acid     | NI                            | NI          | NI          | NI          | NI          | NI          |            |
|   | vanilic acid      | NI                            | NI          | NI          | NI          | NI          | NI          |            |
|   | vanillin          | NI                            | NI          | NI          | NI          | NI          | NI          |            |
|   | p-coumaric acid   | NI                            | NI          | NI          | NI          | NI          | NI          |            |
|   | coniferyl alcohol | NI                            | NI          | NI          | NI          | NI          | NI          |            |
|   | quercetin         | NI                            | NI          | NI          | NI          | NI          | NI          |            |
|   | isorhamnetin      | NI                            | NI          | NI          | NI          | NI          | NI          |            |
|   | kaempferol        | NI                            | NI          | NI          | NI          | NI          | NI          |            |
|   | exudates          | /                             | /           | /           | /           | /           | /           | 88 $\pm$ 2 |

  

| B | compound  | early haustoria induction (%) |             |             |             |             |             | /          |
|---|-----------|-------------------------------|-------------|-------------|-------------|-------------|-------------|------------|
|   |           | 1%                            | 0.1%        | 0.01%       | 0.001%      | 0.0001%     | 0.00001%    |            |
|   | exudates  | /                             | /           | /           | /           | /           | /           | 88 $\pm$ 2 |
|   | DMSO      | NI                            | NI          | NI          | NI          | NI          | NI          |            |
|   | DMSO + Ex | 93% $\pm$ 2                   | 93% $\pm$ 2 | 91% $\pm$ 1 | 95% $\pm$ 1 | 93% $\pm$ 2 | 92% $\pm$ 1 |            |
|   | ACN       | NI                            | NI          | NI          | NI          | NI          | NI          |            |
|   | ACN + Ex  | 80 $\pm$ 3                    | 86 $\pm$ 4  | 85 $\pm$ 4  | 81 $\pm$ 4  | 82 $\pm$ 4  | 86 $\pm$ 4  |            |

**Table S5:** Chromatographic behavior of standard compounds during reversed phase high-performance liquid chromatography (RP-HPLC) fractionation.

Cytokinin standards (**A**) and phenolic HIF (**B**) were prepared as a  $10^{-5}$  M solution in ACN 50 %, 0.1 % acetic acid. Ninety microliters were loaded onto the column.

| <b>A</b> | <b>standard identity</b>                 | <b>retention time</b> | <b>fraction</b> |
|----------|------------------------------------------|-----------------------|-----------------|
|          | <i>trans</i> zeatin O-glucoside          | 19.55                 | 8               |
|          | dihydrozeatin O-glucoside                | 19.79                 | 8               |
|          | <i>trans</i> zeatin                      | 20.13                 | 9               |
|          | dihydrozeatin                            | 20.19                 | 9               |
|          | <i>trans</i> zeatin riboside O-glucoside | 20.37                 | 9               |
|          | <i>trans</i> zeatin riboside             | 20.41/20.90           | 9               |
|          | <i>cis</i> zeatin                        | 20.42                 | 9               |
|          | dihydrozeatin riboside O-glucoside       | 20.46                 | 9               |
|          | dihydrozeatin riboside                   | 20.60/20.95           | 9               |
|          | meta-topolin                             | 21.54                 | 10              |
|          | kinetin                                  | 22.34                 | 11              |
|          | isopentenyl adenine                      | 22.90                 | 11              |
|          | isopentenyl adenosine                    | 23.48                 | 12              |

  

| <b>B</b> | <b>standard identity</b> | <b>retention time</b> | <b>fraction</b> |
|----------|--------------------------|-----------------------|-----------------|
|          | syringic acid            | 22.51                 | 11              |
|          | vanillic acid            | 22.59                 | 11              |
|          | DMBQ                     | 23.44                 | 12              |
|          | coniferyl alcohol        | 23.49                 | 12              |
|          | p-coumaric acid          | 23.55                 | 12              |
|          | vanillin                 | 24.34                 | 13              |
|          | quercetin                | 25.91                 | 14              |
|          | isorhamnetin             | 27.90                 | 16              |
|          | kaemferol                | 29.08                 | 18              |

**Table S6:** Chromatographic behavior of cytokinin standards during UPLC-ESI(+)-MS/MS analysis.

| <b>standard</b> | <b>retention time</b> | <b>precursor</b> | <b>products</b> |     |     |
|-----------------|-----------------------|------------------|-----------------|-----|-----|
| tZ              | 5.71                  | 220              | 148             | 136 | 119 |
| tZOG            | 5.87                  | 382              | 220             | 202 | 136 |
| DHZ             | 5.98                  | 222              | 148             | 136 | 69  |
| cZ              | 6.11                  | 220              | 148             | 136 | 119 |
| DHZOG           | 6.28                  | 384              | 222             | 204 | 136 |
| tZOGR           | 6.96                  | 514              | 382             | 220 | 202 |
| mT              | 7.02                  | 242              | 136             | 107 | 77  |
| DHZOGR          | 7.15                  | 516              | 384             | 222 | 204 |
| tZR             | 7.13                  | 352              | 220             | 202 | 148 |
| DHZR            | 7.19                  | 354              | 222             | 148 | 136 |
| IP              | 8.30                  | 204              | 148             | 136 | 119 |
| IPR             | 9.20                  | 336              | 204             | 148 | 136 |

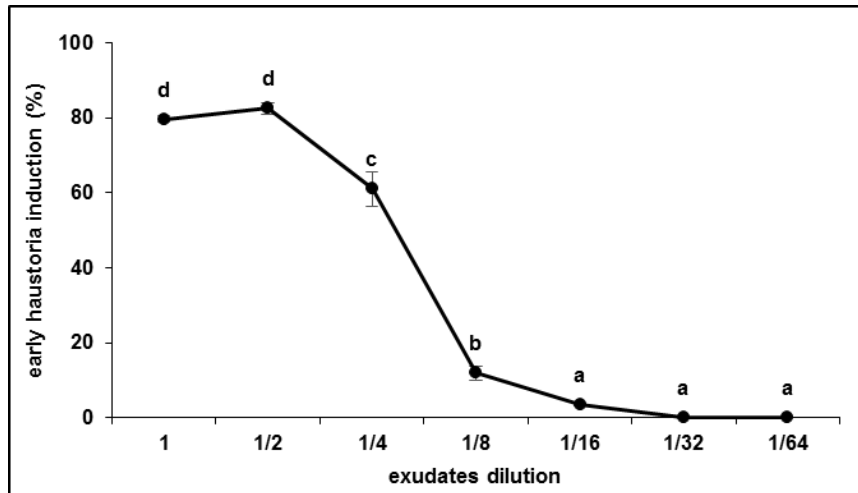

**Fig. S1:** Dose-response effect of exudate dilution.

*P. ramosa* germinated seeds were treated with decreasing concentrations of *B. napus* root exudates for 72hrs. Exudates were diluted in buffer solution (HEPES 0.5 mM, PPM 0.05 %). Means are values  $\pm$  SE (n = 6). Values with the same letter are not significantly different from the control points (Analysis of variance [ANOVA]  $p < 0.001$ ).

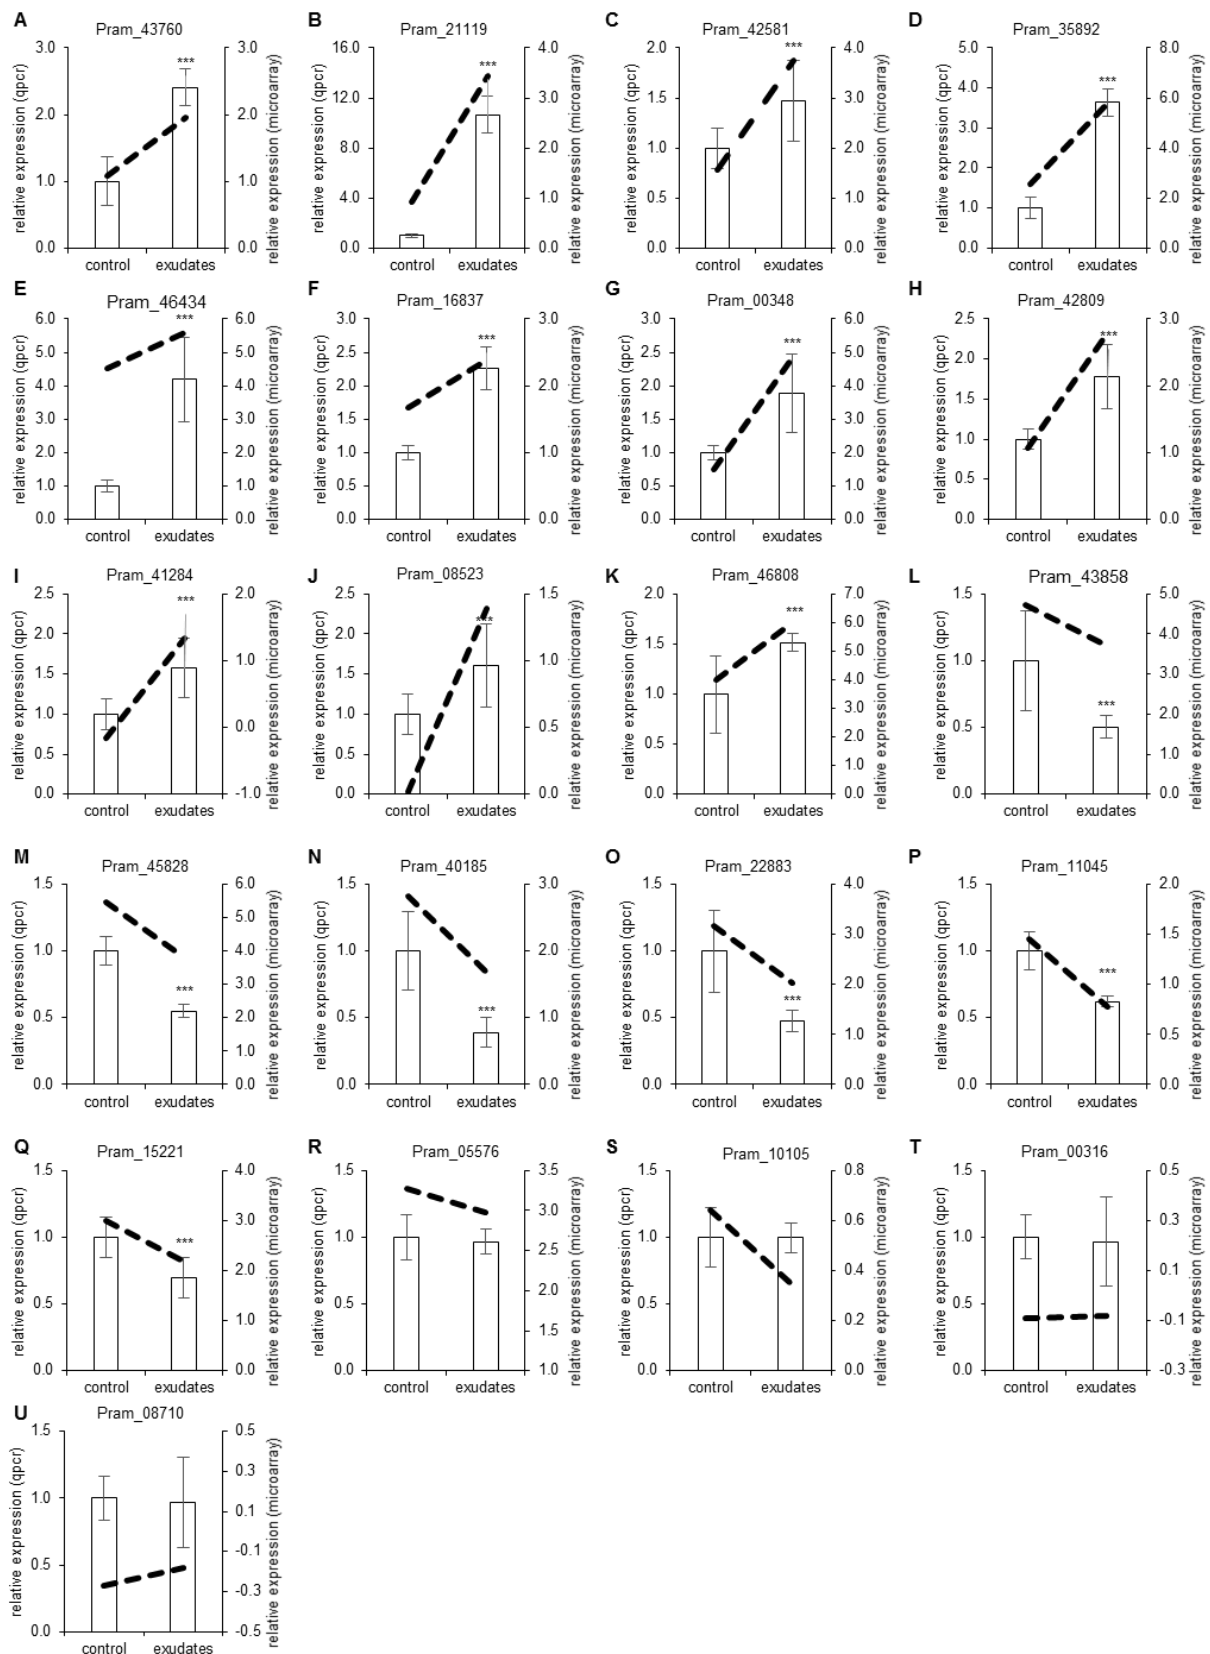

**Figure S2:** RT-qPCR validation of the expression profiles of selected genes.

Fold-induction of gene expression after *B. napus* root exudates or control (Coïc 50) treatment. For comparison, microarray data are shown in the graphs as dashed lines. Data are shown as log<sub>2</sub> fold-



induction of treated germinated seeds compared to non-treated after 24 h of treatment. Two biological replicates were performed, each in three technical replicates. Means are values  $\pm$  SD ( $n = 6$ ). Means annotated with \*\*\* are significantly different from the control points ( $t$ -test,  $p < 0.001$ ).

**Supplementary Data set 1:** GO term enrichment analysis on *de novo* assembly of *P. ramosa* transcriptome (see joint Excel file)

**Supplementary Data set 2:** GO term enrichment analysis on the DEG set (see joint Excel file)
